# Supplementary material for: A new synthesis strategy for nitrogen-doped carbon nanofibers with cobalt oxide nanoparticles as anodic electrode materials for lithium ion batteries
Source: Royal Society of Chemistry journal article supplement (doi:10.1039/d3cc04394k), 2023-01-01
Supplement: d3cc04394k1.pdf [file d3cc04394k1.pdf]

## Supporting Information

### **A new synthesis strategy for nitrogen-doped carbon nanofibers with cobalt oxide nanoparticles as anodic electrode materials for lithium ion batteries**

Feng-Ming Liu,<sup>a</sup> Ming-Yang Zhao,<sup>a</sup> Shuo Wang,<sup>a</sup> Ming Chen,<sup>\*a</sup> Xing Qian,<sup>b</sup> Zhong-Yong Yuan<sup>c</sup>, Yan Sun,<sup>d</sup> Chun-Sheng Li<sup>d</sup> and Rong Wan<sup>\*a</sup>

<sup>a</sup> College of Chemistry and Chemical Engineering, Xinyang Normal University, Xinyang 464000, China \*E-mail: chenming19830618@126.com, wanrong1992@163.com

<sup>b</sup> College of Chemical Engineering, Fuzhou University, Fuzhou 350116, China.

<sup>c</sup> School of Materials Science and Engineering, Nankai University, Tianjin 300071, China

<sup>d</sup> School of Chemistry and Life Sciences, Suzhou University of Science and Technology

### **Experimental Section**

#### **Preparation of Samples.**

**The in situ synthesis of Co@NCNR and Co@NCNT arrays:** 2 g  $\text{CoCl}_2 \cdot 6\text{H}_2\text{O}$  and 5 g melamine or 3 g triazole were added to 5 ml aqueous solution under tempestuously stirring to form a brown or purple colored slurry. Then, the colloidal compounds were milled continually to form a paste, following the evaporation of water. The obtained paste was dried at 80 °C for 24 h and manually ground into powder. The powder was transferred to a semiclosed quartz boat and heated at 350 °C for 1 h at a heating rate of 2 °C  $\text{min}^{-1}$  in a tubular furnace under  $\text{N}_2$  flow, and the

temperature was increased to 700 °C at 2 °C min<sup>-1</sup> and kept at 700 °C for 3 h, followed by cooling to room temperature naturally.

**The in situ synthesis of Co<sub>3</sub>O<sub>4</sub>@NCNR and Co<sub>3</sub>O<sub>4</sub>@NCNT arrays:** The obtained Co@NCNR and Co@NCNT powder was calcined in a muffle furnace in air at 410 °C for 1 h with a heating rate of 5 °C min<sup>-1</sup>, and the final product was obtained.

**The synthesis of Co<sub>3</sub>O<sub>4</sub>@CB:** 6 g CoCl<sub>2</sub>·6H<sub>2</sub>O and 5 g carbon black was dispersed in 5 ml deionized water and ground by mortar and pestle to form a slurry. Then the slurry was dried at 80 °C in oven overnight. The obtained powder was transferred to a quartz boat and covered by a quartz cap. Then heat treated at 410 °C for 1 h in air to form Co<sub>3</sub>O<sub>4</sub>@CB.

## Material Characterization

The crystalline structure of the products was characterized by X-ray diffraction (XRD) on a Rigaku SmartLab9 powder diffractometer equipped with Cu K<sub>α</sub> radiation ( $\lambda = 1.541 \text{ \AA}$ ). Thermogravimetric analysis (TGA) was performed on a TA SDT Q600 analyser in air with a heating rate of 10 K min<sup>-1</sup>. The morphology of the products was observed by field emission scanning electron microscopy (FE-SEM) on a ZEISS SUPRA 55 microscope and transmission electron microscopy (TEM) on a Tecnai G2 F20 microscope. X-ray photoelectron spectroscopy (XPS) was conducted using a Kratos Axis Ultra DLD (delay line detector) spectrometer equipped with a monochromatic Al K<sub>α</sub> X-ray source (1486.6 eV). Raman spectra were collected on a Renishaw-1000 spectrometer by exciting a 514.5 nm Ar ion laser. N<sub>2</sub> adsorption-desorption isotherms were recorded at 77 K on a Quantachrome NOVA 2000e sorption analyzer.

## Electrochemical Characterization

Co<sub>3</sub>O<sub>4</sub>@NCNR, Co<sub>3</sub>O<sub>4</sub>@NCNT or Co<sub>3</sub>O<sub>4</sub>@CB and polyvinylidene fluoride (PVDF) binder in a weight ratio of 9 : 1 were mixed in N-methylpyrrolidone (NMP)

and stirred for 24 h to make a slurry. The slurry was then spread on a Cu foil (13 mm in diameter, 0.3 mm in thickness) with a surface density of 1.0 mg cm<sup>-2</sup> and dried at 120 °C for 24 h to fabricate the working electrodes in vacuum. Lithium foil was used as both the reference electrode and the counter electrode (13 mm in diameter, 0.5 mm in thickness). 1.0 M LiPF<sub>6</sub> in a 1:1 (v/v) mixture of ethylene carbonate (EC) and diethyl carbonate (DEC) was employed as the electrolyte. Celgard 2300 membrane (25 μm-thick polyethylene) was adopted as a separator. The assembly of CR2032-type coin cells was conducted in a high-purity Ar filled glovebox. Galvanostatic cycling was performed between 0.01 and 3 V vs Li<sup>+</sup>/Li at various C rates on a Land Battery Tester (Wuhan, China), where 1 C corresponds to 1000 mA g<sup>-1</sup>. Cyclic voltammetry (CV) was conducted between 0.01 and 3 V at 0.1 mV s<sup>-1</sup> using a CHI660E electrochemical workstation. Electrochemical impedance spectroscopy (EIS) was performed on the same electrochemical system over the frequency range from 100 kHz to 100 mHz with a perturbation voltage of 5 mV. All of the electrochemical measurements were performed at 25 °C in an ambient atmosphere.

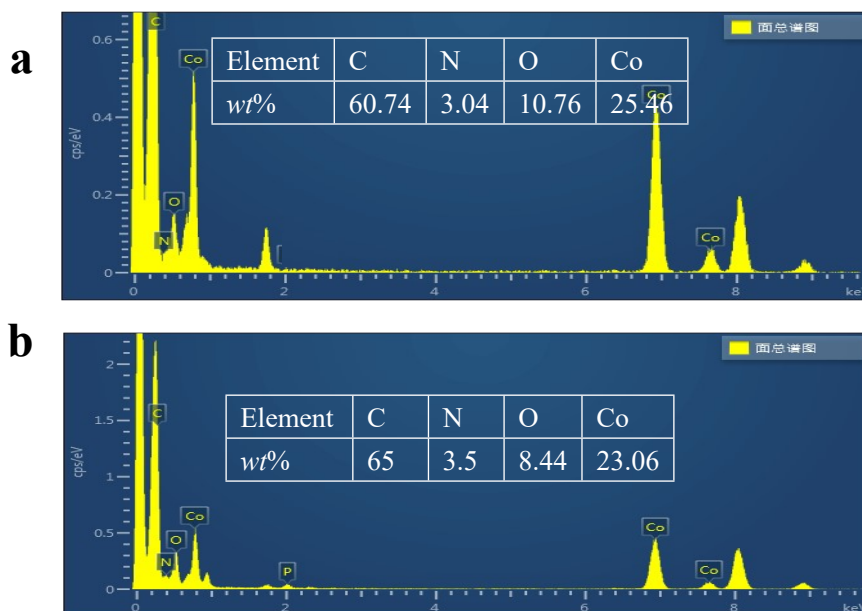

**Fig. S1** EDS analysis for (a) Co<sub>3</sub>O<sub>4</sub>@NCNR and (b) Co<sub>3</sub>O<sub>4</sub>@NCNT, respectively.

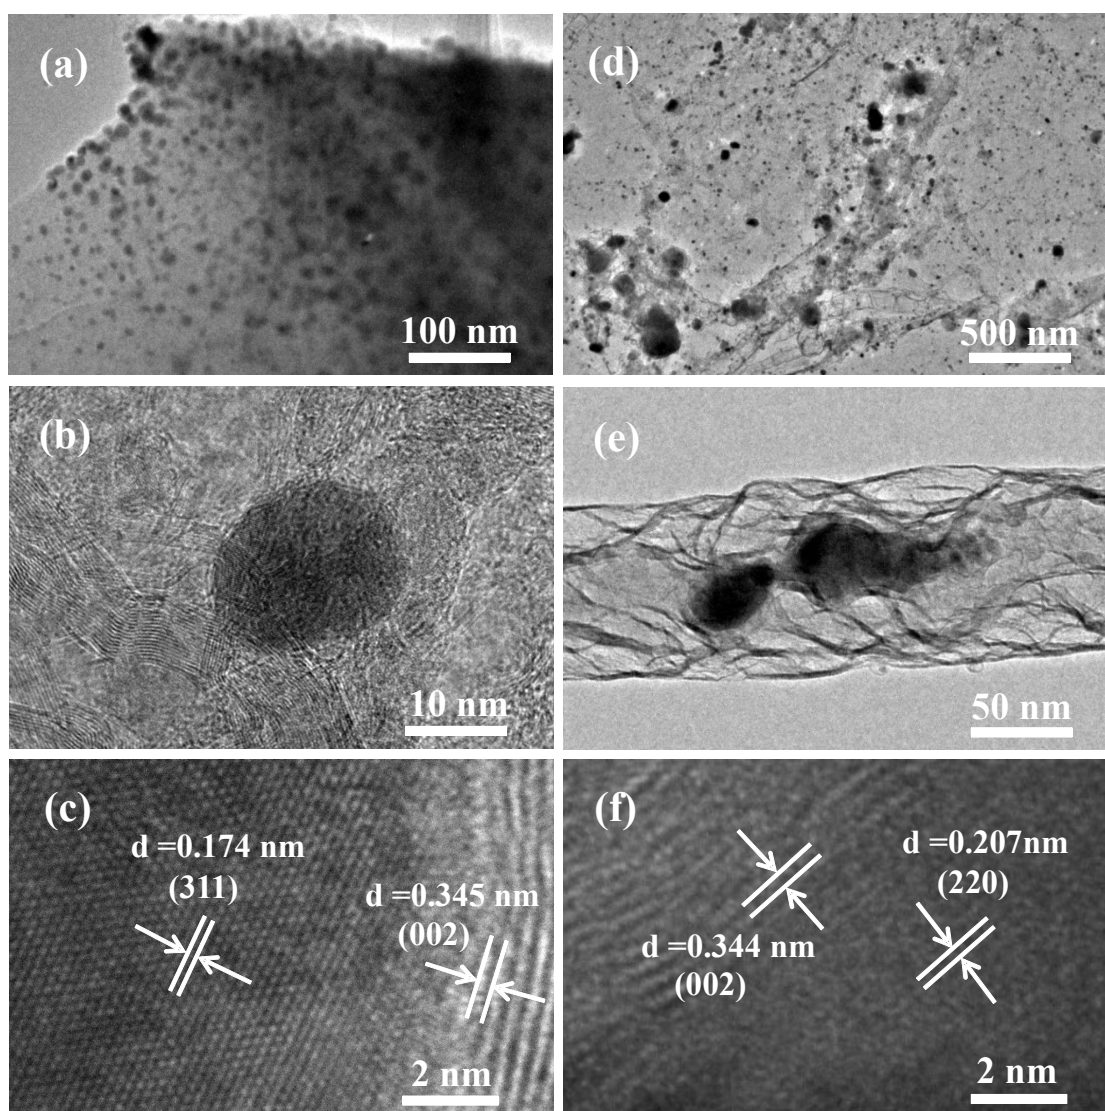

**Fig. S2** TEM images of (a-c)  $\text{Co}_3\text{O}_4$ @NCNR and (d-f)  $\text{Co}_3\text{O}_4$ @NCNT, respectively.

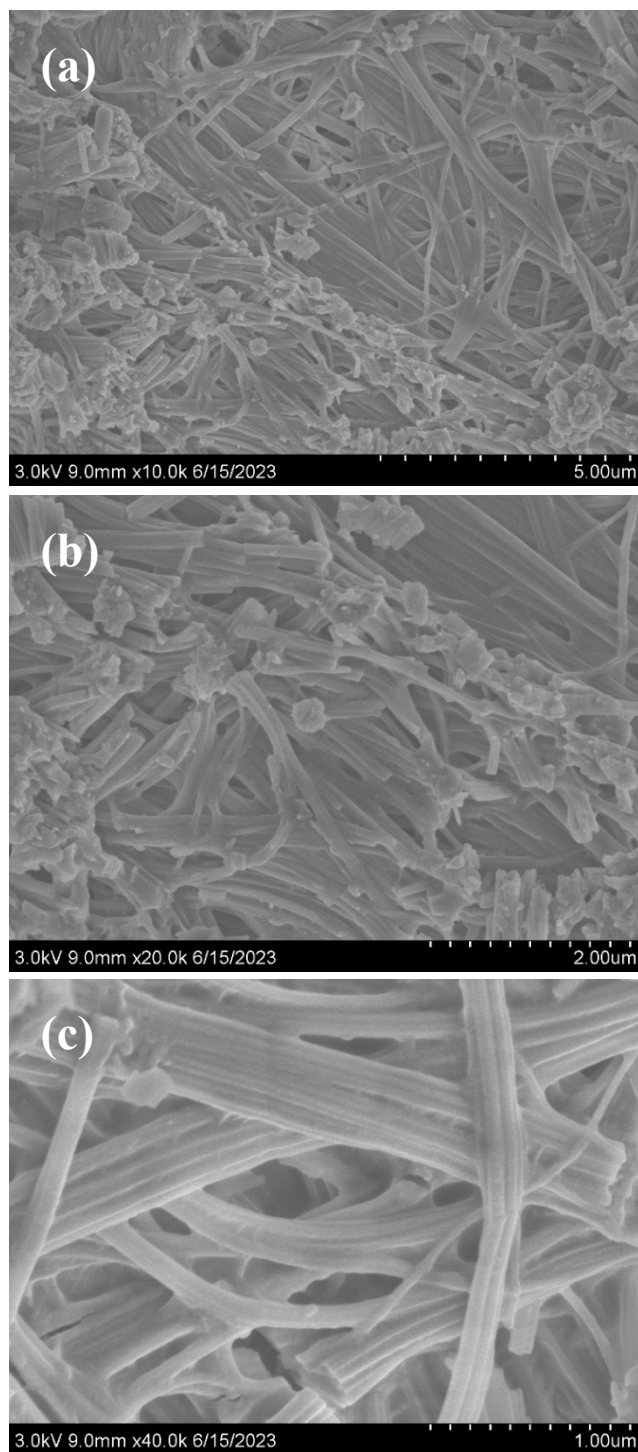

**Fig. S3** SEM images of  $\text{Co}_3\text{O}_4@\text{NCNR}$  precursor of one-dimensional Co(II)-triazole framework composed nanobelts.

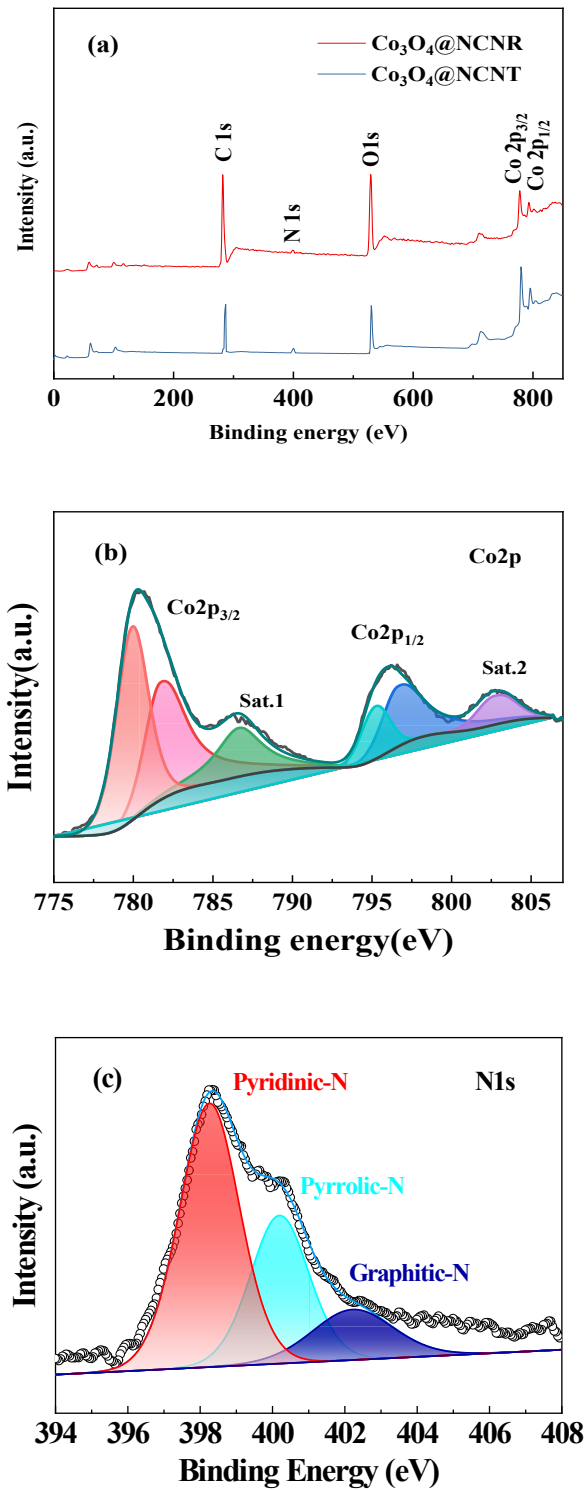

**Fig. S4** (a) XPS survey spectra of  $\text{Co}_3\text{O}_4@\text{NCNR}$  and  $\text{Co}_3\text{O}_4@\text{NCNT}$  hybrids, High-resolution XPS of  $\text{Co } 2p$  (b) and  $\text{N } 1s$  (c) for  $\text{Co}_3\text{O}_4@\text{NCNT}$ .

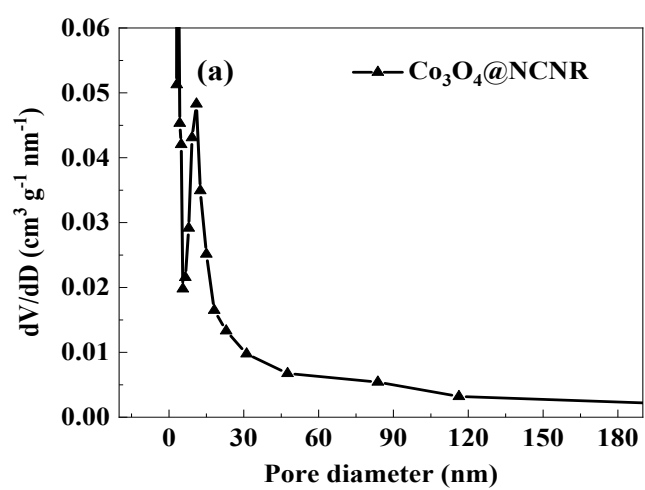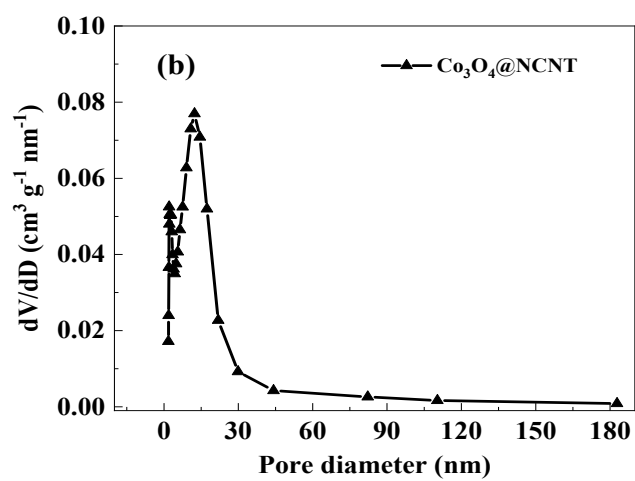

**Fig. S5** The pore size distribution of (a)  $\text{Co}_3\text{O}_4@\text{NCNR}$  and (b)  $\text{Co}_3\text{O}_4@\text{CB}$  hybrid.

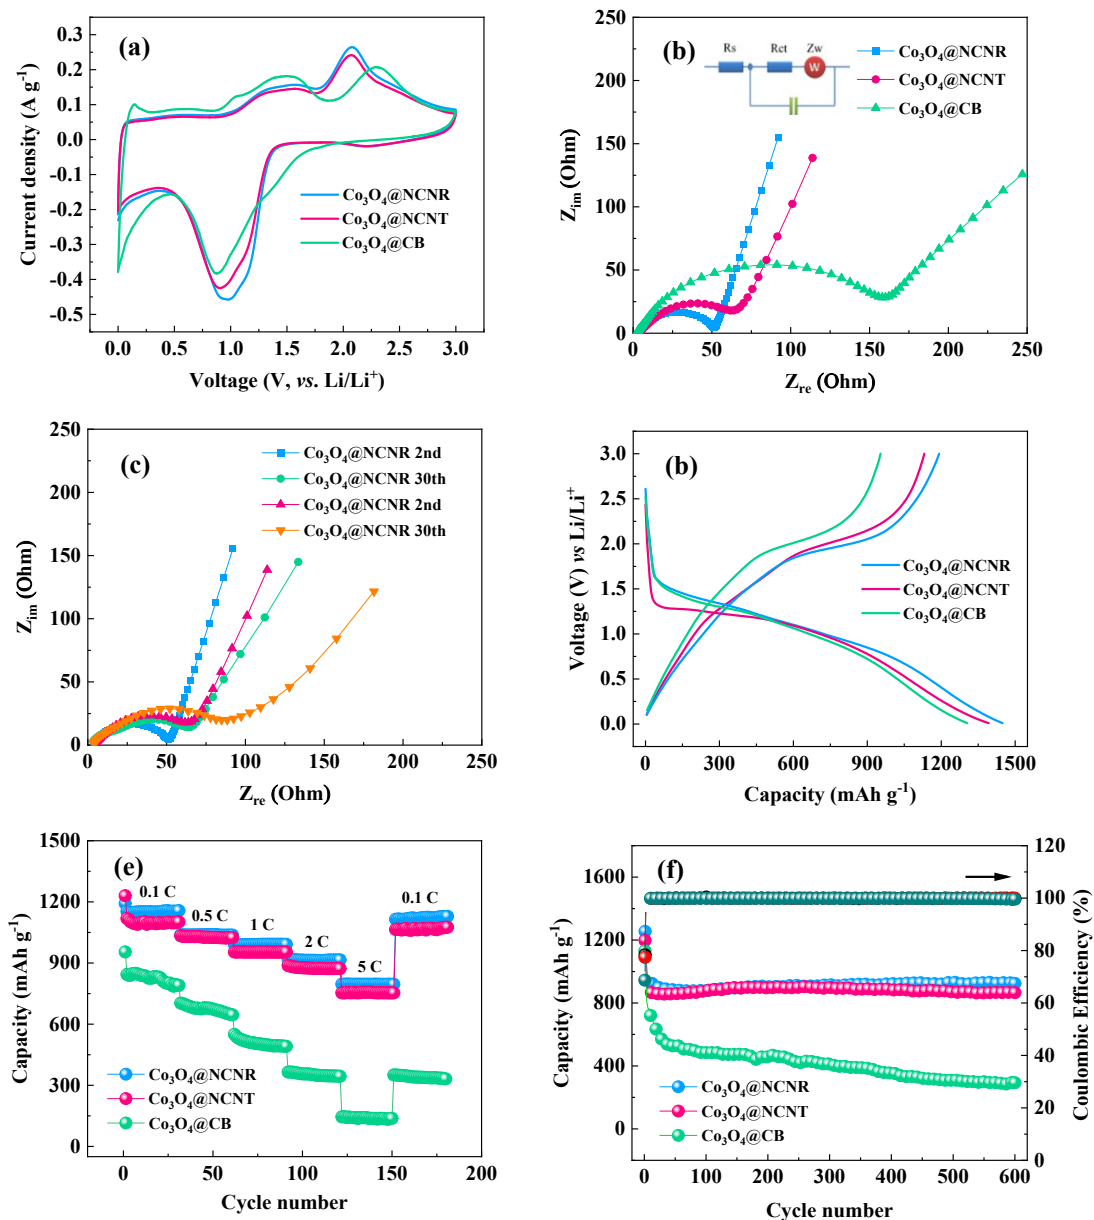

**Fig. S6**  $\text{Co}_3\text{O}_4@ \text{NCNR}$ ,  $\text{Co}_3\text{O}_4@ \text{NCNT} || \text{Li}$  half-cells: (a) CV at 0.1 mV s<sup>-1</sup>, (b) EIS and equivalent circuit model (inset), (c) voltage window of 0.01-3 V, (d) rate capability from 100 mA g<sup>-1</sup> to 5 A g<sup>-1</sup>, and (e) long-term cycling performance at 1 A g<sup>-1</sup>, the capacity based on the mass of  $\text{Co}_3\text{O}_4$ .



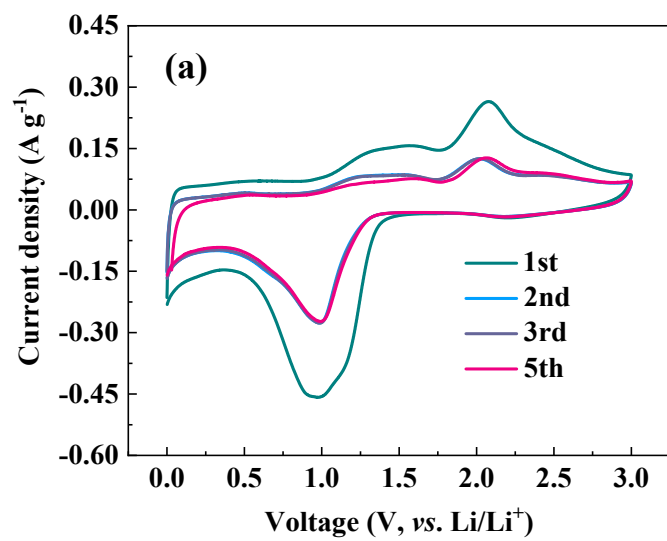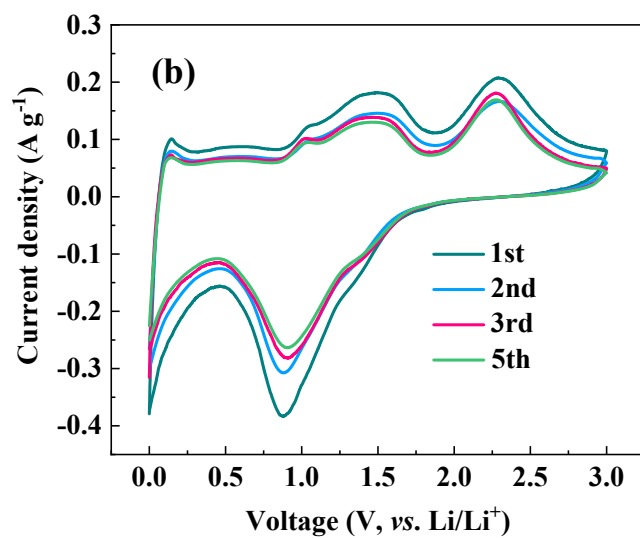

**Fig. S7** CV curves of (a)  $\text{Co}_3\text{O}_4@\text{NCNR}$  and (b)  $\text{Co}_3\text{O}_4@\text{CB}$  hybrid electrodes at the 1st, 2nd, 3rd and 5th cycle.

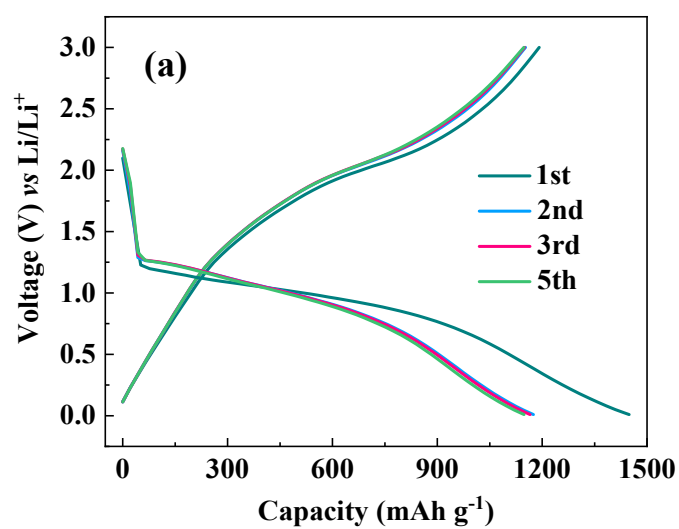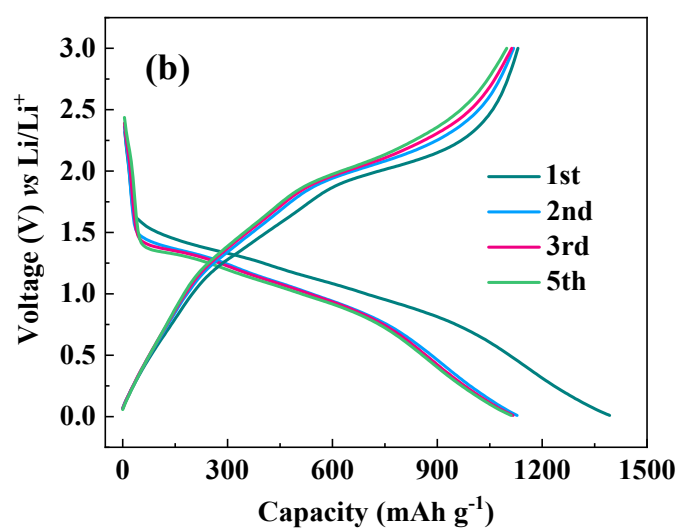

**Fig. S8** Discharge/charge voltage window of (a)  $\text{Co}_3\text{O}_4@\text{NCNR}$  and (b)  $\text{Co}_3\text{O}_4@\text{NCNT}$  hybrid electrodes at the 1st, 2nd, 3rd and 5th cycle between 0.01-3 V.

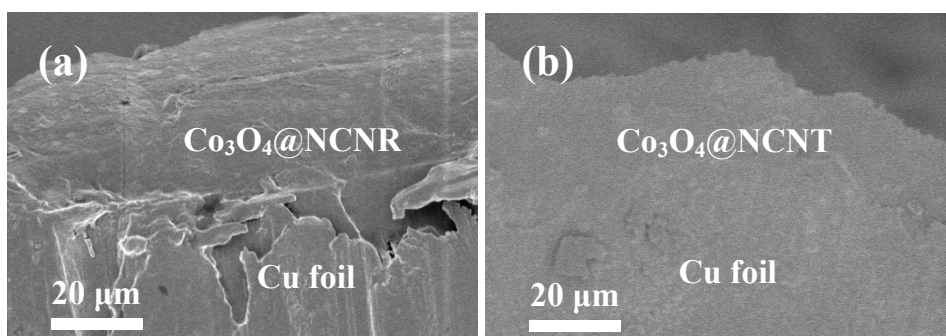

**Fig. S9** The cross-sectional SEM images of (a) Co<sub>3</sub>O<sub>4</sub>@NCNR and (b) Co<sub>3</sub>O<sub>4</sub>@NCNT electrode after 600 cycles.

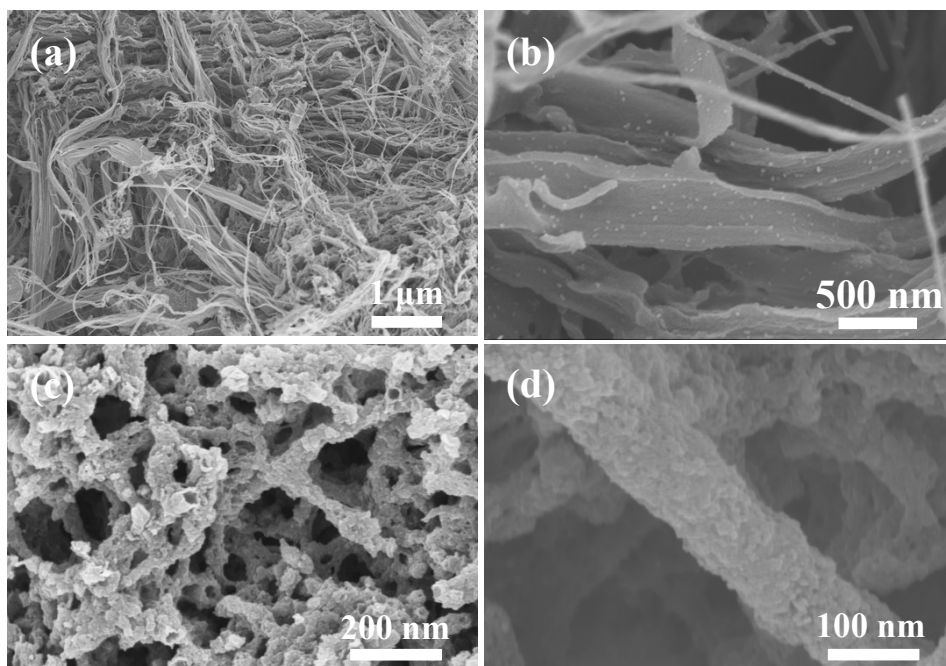

**Fig. S10** Top-view SEM images of (a, b) Co<sub>3</sub>O<sub>4</sub>@NCNR and (c, d) Co<sub>3</sub>O<sub>4</sub>@NCNT electrode after 600 cycles.

**Table S1.** Comparison of the electrochemical performances of various Co<sub>3</sub>O<sub>4</sub>-based anode materials for LIBs.

| Electrode materials                                                                                                                 | Current density [A g <sup>-1</sup> ] | Initial discharge/charge capacities [mA h g <sup>-1</sup> ] | Discharge capacity [mA h g <sup>-1</sup> ] and (cycle number) | Rate capability [mA h g <sup>-1</sup> ] | Ref. |
|-------------------------------------------------------------------------------------------------------------------------------------|--------------------------------------|-------------------------------------------------------------|---------------------------------------------------------------|-----------------------------------------|------|
| Co <sub>3</sub> O <sub>4</sub> @C polyhedrons                                                                                       | 1.0                                  | 1463/1118 (0.1 A g <sup>-1</sup> )                          | 840 (150)                                                     | 596 (5.0 A g <sup>-1</sup> )            | [S1] |
| Co <sub>3</sub> O <sub>4</sub> /carbon (Co <sub>3</sub> O <sub>4</sub> /C)                                                          | 0.089                                | 1458/945 (0.089A g <sup>-1</sup> )                          | 877 (200)                                                     | 669 (2.0 A g <sup>-1</sup> )            | [S2] |
| Double carbon coated cross-linked Co <sub>3</sub> O <sub>4</sub> (Co <sub>3</sub> O <sub>4</sub> NP@NC@CNTs)                        | 1.0                                  | 1570/1020                                                   | 1017(500)                                                     | 537 (8.0 A g <sup>-1</sup> )            | [S3] |
| Co@Co <sub>3</sub> O <sub>4</sub> /CNTs nanocomposite                                                                               | 2.0                                  | 1115/750                                                    | 529 (600)                                                     | 529 (2.0 A g <sup>-1</sup> )            | [S4] |
| Co <sub>3</sub> O <sub>4</sub> nanoparticles embedded carbonaceous fibre (Co <sub>3</sub> O <sub>4</sub> /CF)                       | 0.089                                | 1246/733 (0.089 A g <sup>-1</sup> )                         | 730 (100)                                                     | 240 (4.45A g <sup>-1</sup> )            | [S5] |
| three-dimensional Co <sub>3</sub> O <sub>4</sub> /C nanocomposites                                                                  | 2.0                                  | 1143/862 (0.1 A g <sup>-1</sup> )                           | 561 (500)                                                     | 593 (2.0 A g <sup>-1</sup> )            | [S6] |
| Co <sub>3</sub> O <sub>4</sub> nanoparticles into nitrogen-doped graphitic carbon nanofibers (Co <sub>3</sub> O <sub>4</sub> @NGFs) | 2.0                                  | 1060.2/500.8 (2.0 A g <sup>-1</sup> )                       | 408.4 (600)                                                   | 484.4 (2.0 A g <sup>-1</sup> )          | [S7] |
| the in-situ fabricated 3D flower-like hybrid with Co <sub>3</sub> O <sub>4</sub> nanoparticles (Co <sub>3</sub> O <sub>4</sub> /NC) | 0.5                                  | 1265.4/989.1 (0.1 A g <sup>-1</sup> )                       | 671.1 (500)                                                   | 498.8 (4.0 A g <sup>-1</sup> )          | [S8] |
| N-doped carbon                                                                                                                      | 1.0                                  | 1567/768                                                    | 905 (350)                                                     | 271                                     | [S9] |

|                                                                                                                                    |     |                                           |             |                                   |                  |
|------------------------------------------------------------------------------------------------------------------------------------|-----|-------------------------------------------|-------------|-----------------------------------|------------------|
| coated hollow Co <sub>3</sub> O <sub>4</sub> nanocrystals<br>H-N-C@Co <sub>3</sub> O <sub>4</sub> /CNT                             |     |                                           |             | (12.5 A g <sup>-1</sup> )         |                  |
| Co <sub>3</sub> O <sub>4</sub> /Co@N-doped carbon nanotubes (T-Co <sub>3</sub> O <sub>4</sub> /Co@NC)                              | 0.5 | 693/563.5                                 | 689.2 (400) | 655.4<br>(0.2 A g <sup>-1</sup> ) | [S10]            |
| Nitrogen-doped carbon nanobelts decorated with Co <sub>3</sub> O <sub>4</sub> nanoparticles (Co <sub>3</sub> O <sub>4</sub> @NCNR) | 1.0 | 1389.2/1050.7<br>(0.1 A g <sup>-1</sup> ) | 944.7(600)  | 768<br>(5.0 A g <sup>-1</sup> )   | <b>This work</b> |

## References

- [S1] Y. L. Tan, C. X. Yang, W. W. Qian, X. Sui, C. Teng, Q. Li, Z. Lu, Carbon coated porous Co<sub>3</sub>O<sub>4</sub> polyhedrons as anode materials for highly reversible lithium-ion storage, *J. Alloys Compd.*, 2021, **855**, 157387.
- [S2] G. R. Wang, F. L. Zhu, J. Xia, L. Wang, Y. S. Meng, Y. Zhang, Preparation of Co<sub>3</sub>O<sub>4</sub>/carbon derived from ionic liquid and its application in lithium-ion batteries, *Electrochim. Acta*, 2017, **257**, 138-145.
- [S3] Y. Wang, S. J. Fan, S. X. Wu, C. Wang, Z. G. Huang and L. Zhang, In situ synthesis and unprecedented electrochemical performance of double carbon coated cross-linked Co<sub>3</sub>O<sub>4</sub>, *ACS Appl. Mater. Interfaces*, 2018, **10**, 42372-42379.
- [S4] Y. T. Zhao, W. J. Dong, M. S. Riaz, H. X. Ge, X. Wang, Z. C. Liu and F. Q. Huang, "Electron-sharing" mechanism promotes Co@Co<sub>3</sub>O<sub>4</sub>/CNTs composite as the high-capacity anode material of lithium-ion battery, *ACS Appl. Mater. Interfaces*, 2018, **10**, 43641-43649.
- [S5] J. Sun, D. Li, Y. Xia, X. Zhu, L. Zong, Q. Ji, Y. A. Jia and D. Yang, Co<sub>3</sub>O<sub>4</sub> nanoparticle embedded carbonaceous fibres: a nanoconfinement effect on enhanced lithium-ion storage, *Chem. Commun.*, 2015, **51**, 16267-16270.
- [S6] F. Wang, Y. X. Long, J. G. Zong, M. Zhao, S. Yang and X. Song, Three-dimensional nanocomposites with Co<sub>3</sub>O<sub>4</sub> nanosheets parallelly embedded in carbon network walls for enhanced lithium-ion storage, *Dalton Trans.*, 2019, **48**, 8375-8383.
- [S7] Y. Chen, T. Wu, W. Chen, W. Zhang, L. Zhang, Z. Zhu, M. Shao, B. Zheng, S. Li, W. Zhang, W. Pei, J. Wu and F. Huo, Co<sub>3</sub>O<sub>4</sub> nanoparticles embedded in nitrogen-doped graphitic carbon fibers as free-standing electrode for promotion of lithium ion storage with capacitive contribution, *Chem. Commun.*, 2020, **56**, 5767-5770.
- [S8] J. Li, D. Yan, S. Hou, T. Lu, Y. Yao, L. Pan, Metal-organic frameworks converted flower-like hybrid with Co<sub>3</sub>O<sub>4</sub> nanoparticles decorated on nitrogen-doped carbon sheets for boosted lithium storage, performance, *Chem. Eng. J.*, 2018, **354**, 172-181.

- [S9] S. J. Huang, L. W. Yang, G. B. Xu, T. Y. Wei, J. Tian, X. Liu, H. P. Li, Z. Y. Xiang, J. X. Cao, X. L. Wei, Hollow  $\text{Co}_3\text{O}_4$ @N-doped carbon nanocrystals anchored on carbon nanotubes for freestanding anode with superior Li/Na storage performance, *Chem. Eng. J.*, 2021, **415**, 128861.
- [S10] Z. Chen, S. Wang, Z. Zhang, W. Zhou, D. Chen, Facile synthesis of  $\text{Co}_3\text{O}_4/\text{Co}$ @N-doped carbon nanotubes as anode with improved cycling stability for Li-ion batteries, *Electrochim. Acta*, 2018, **292**, 575-585.
